# Supplementary material for: Surface-Oxidized Polymer-Stabilized Silver Nanoparticles as a Covering Component of Suture Materials
Source: MDPI journal article supplement (doi:10.3390/mi13071105), 2022-07-14
Supplement: s1 [file s1]

## Supplementary Materials

# Surface-Oxidized Polymer-Stabilized Silver Nanoparticles as a Covering Component of Suture Materials

Andrey Vladimirovich Blinov <sup>1</sup>, Andrey Ashotovich Nagdalian <sup>1,2,\*</sup>, Sergey Nikolaevich Povetkin <sup>1</sup>, Alexey Alekseevich Gvozdenko <sup>1</sup>, Marina Nikolaevna Verevkin <sup>3</sup>, Igor Vladimirovich Rzhepakovsky <sup>1</sup>, Mariya Sergeevna Lopteva <sup>4</sup>, David Guramievich Maglakelidze <sup>1</sup>, Tatyana Semenovna Kataeva <sup>5</sup>, Anastasiya Aleksandrovna Blinova <sup>1</sup>, Alexey Borisovich Golik <sup>1</sup>, Galina Vladimirovna Osipchuk <sup>6</sup> and Mohammad Ali Shariati <sup>7</sup>

<sup>1</sup> Department of Physics and Technology of Nanostructures and Materials, North Caucasus Federal University, 355017 Stavropol, Russia; ablinov@ncfu.ru (A.V.B.); d22003807-help@mail.ru (S.N.P.); gvozdenko.1999a@gmail.com (A.A.G.); 78igorr@mail.ru (I.V.R.); ogoniok2015@mail.ru (D.G.M.); nastya\_bogdanova\_88@mail.ru (A.A.B.); lexgooldman@gmail.com (A.B.G.)

<sup>2</sup> Saint Petersburg State Agrarian University, 196601 Saint Petersburg, Russia

<sup>3</sup> Department of Parasitology and Veterinary Examination, Anatomy and Pathanatomy Named after Professor S. N. Nikolsky, Stavropol State Agrarian University, 355017 Stavropol, Russia; serenkiy7@yandex.ru

<sup>4</sup> Veterinary Medicine Laboratory of the Animal Husbandry and Veterinary Medicine Department, North Caucasus Federal Agrarian Research Centre, 356241 Mikhailovsk, Russia; zmejka-2007@mail.ru

<sup>5</sup> Department of Parasitology, Veterinary and Sanitary Expertise, Faculty of Veterinary Medicine, Kuban State Agrarian University Named after I. T. Trubilin, 350044 Krasnodar, Russia; cluster26@yandex.ru

<sup>6</sup> Laboratory of Embryos Reproduction and Transplantation, Scientific-Practical Institute of Biotechnologies in Animal Science and Veterinary Medicine, 249053 Maksimovka Village, Moldova; galadok@rambler.ru

<sup>7</sup> Department of Scientific Research, K.G. Razumovsky Moscow State University of Technologies and Management (The First Cossack University), 109004 Moscow, Russia; shariatymohammada-li@gmail.com

\* Correspondence: geniando@yandex.ru

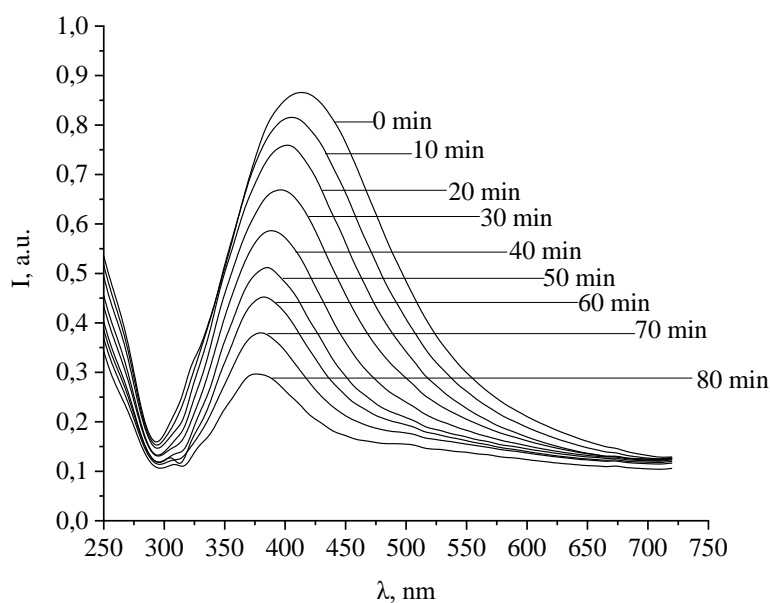

a

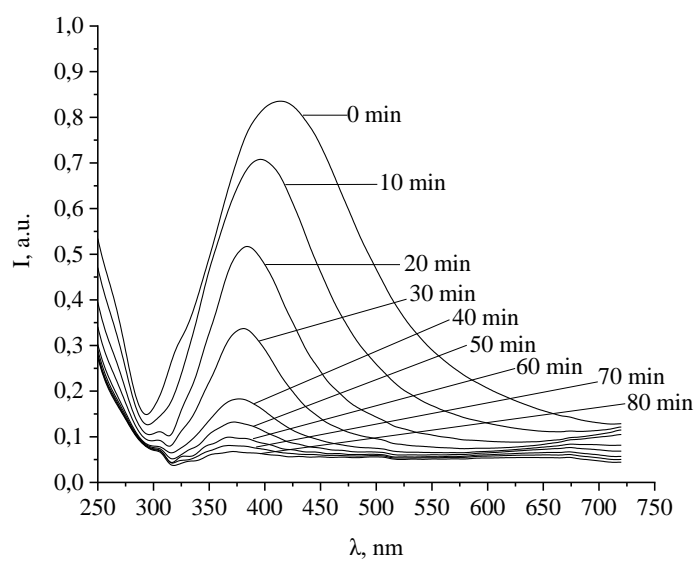**b**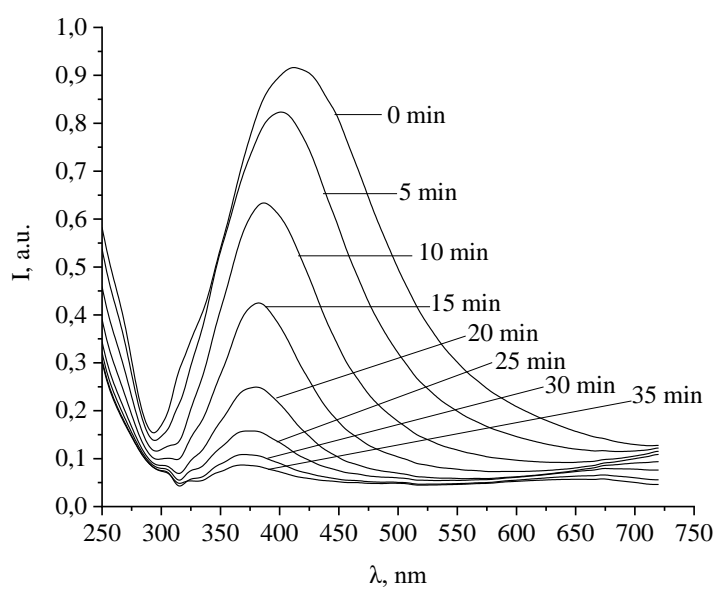**c**

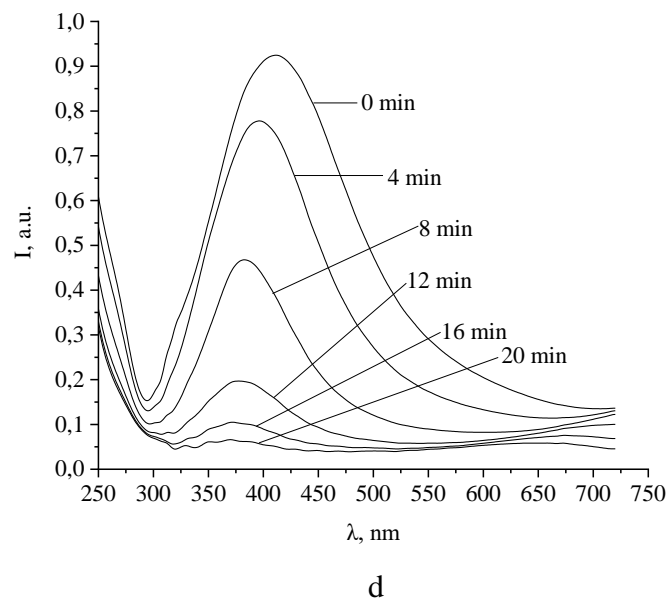

**Figure S1.** Absorption spectra of the mixture of Ag NPs and oxidizer in the ratio: a –  $Ag:H_2O_2 = 1:5$ ; b –  $Ag:H_2O_2 = 1:10$ ; c –  $Ag:H_2O_2 = 1:15$ ; d –  $Ag:H_2O_2 = 1:20$ .

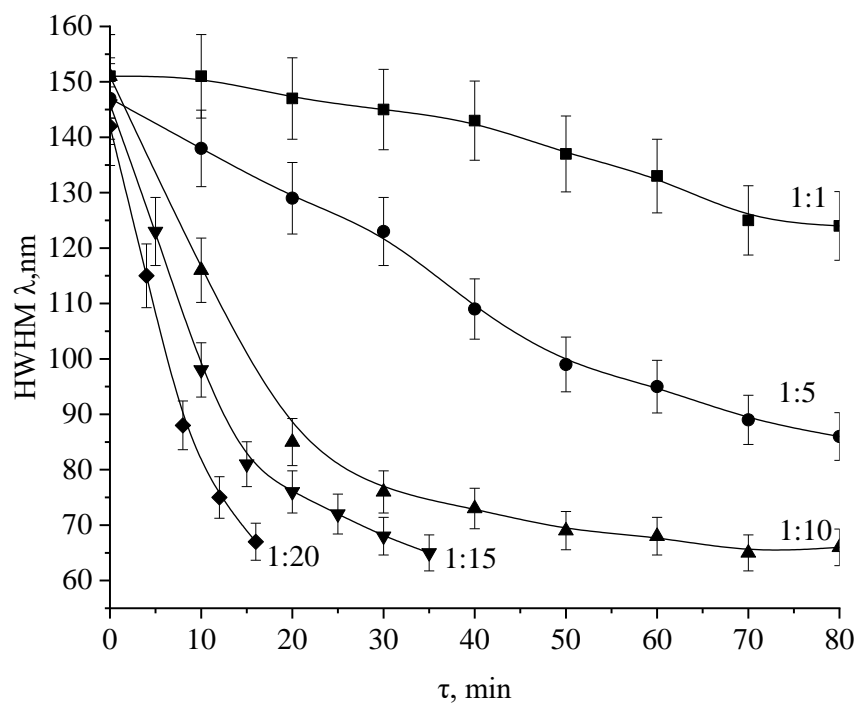

**Figure S2.** Kinetic dependences of the change of half-width at the half-height of the absorption band of the plasmon resonance of Ag NPs during oxidation with  $H_2O_2$ .
